# Supplementary material
Source: PubMed Central journal article supplement (PMC2912170)
Supplement: NIHMS209399-supplement-1_si_001.pdf [file NIHMS209399-supplement-1_si_001.pdf]

# Supporting Information

## Synthesis and Characterization of Free-Base, Copper and Nickel Isocorroles

Giuseppe Pomarico,<sup>1</sup> Xiao Xiao,<sup>3</sup> Sara Nardis,<sup>1</sup> Roberto Paolesse,<sup>1\*</sup> Frank R. Fronczek,<sup>2</sup> Kevin M. Smith,<sup>2\*</sup> Yuanyuan Fang,<sup>3,4</sup> Zhongping Ou,<sup>3,4</sup> and Karl M. Kadish<sup>3\*</sup>

<sup>1</sup>*Department of Chemical Sciences and Technologies, University of Rome Tor Vergata, Via della Ricerca Scientifica 1, 00133 Rome, Italy;*

<sup>2</sup>*Department of Chemistry, Louisiana State University, Baton Rouge, Louisiana 70803*

<sup>3</sup>*Department of Chemistry, University of Houston, Houston, Texas 77204-5003 US*

<sup>4</sup>*Department of Applied Chemistry, Jiangsu University, Zhenjiang, 212013 P. R. China*

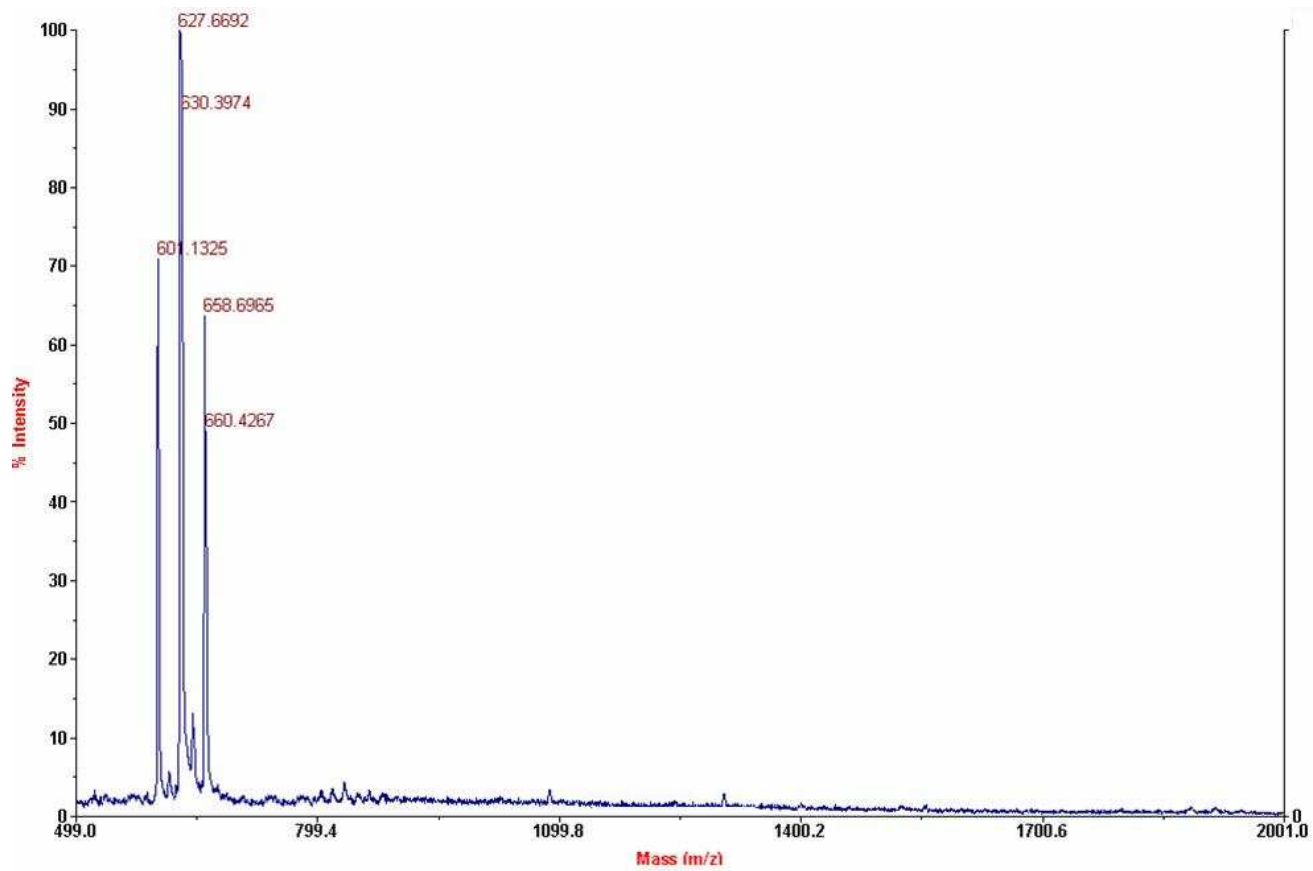

**Figure S1.** Mass spectrum of (TT-10-isoCor)Cu.

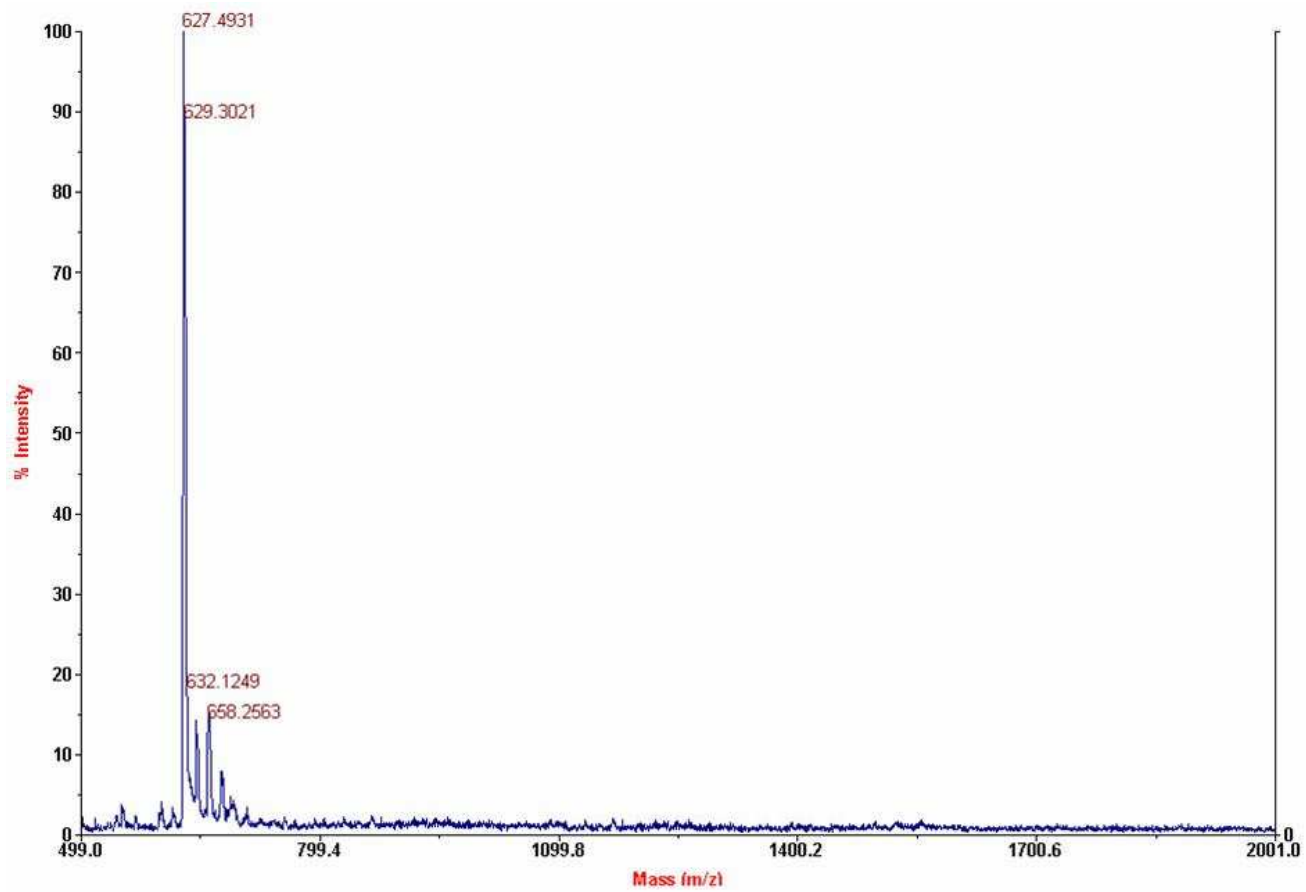

**Figure S2.** Mass spectrum of (TT-5-isoCor)Cu.

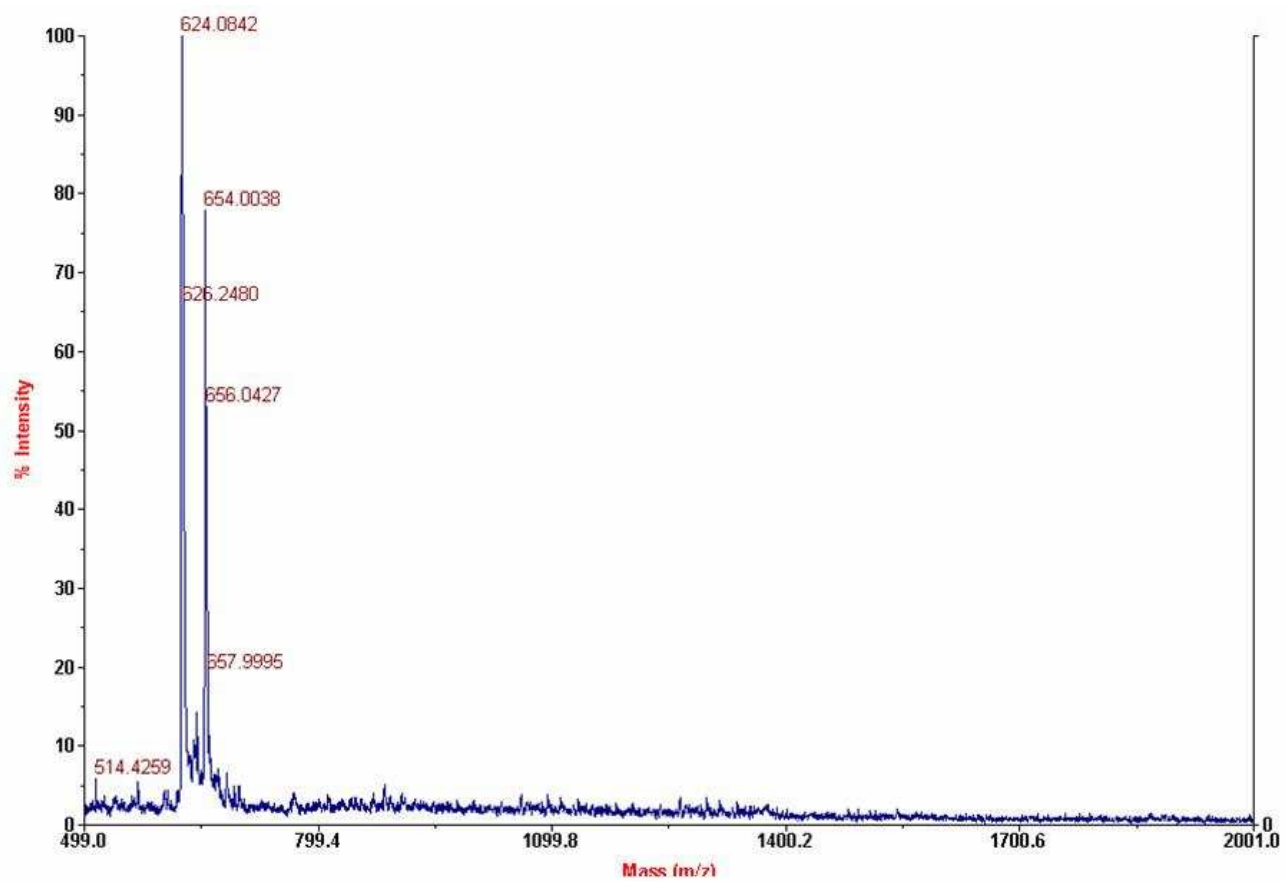

**Figure S3.** Mass spectrum of (TT-10-isoCor)Ni

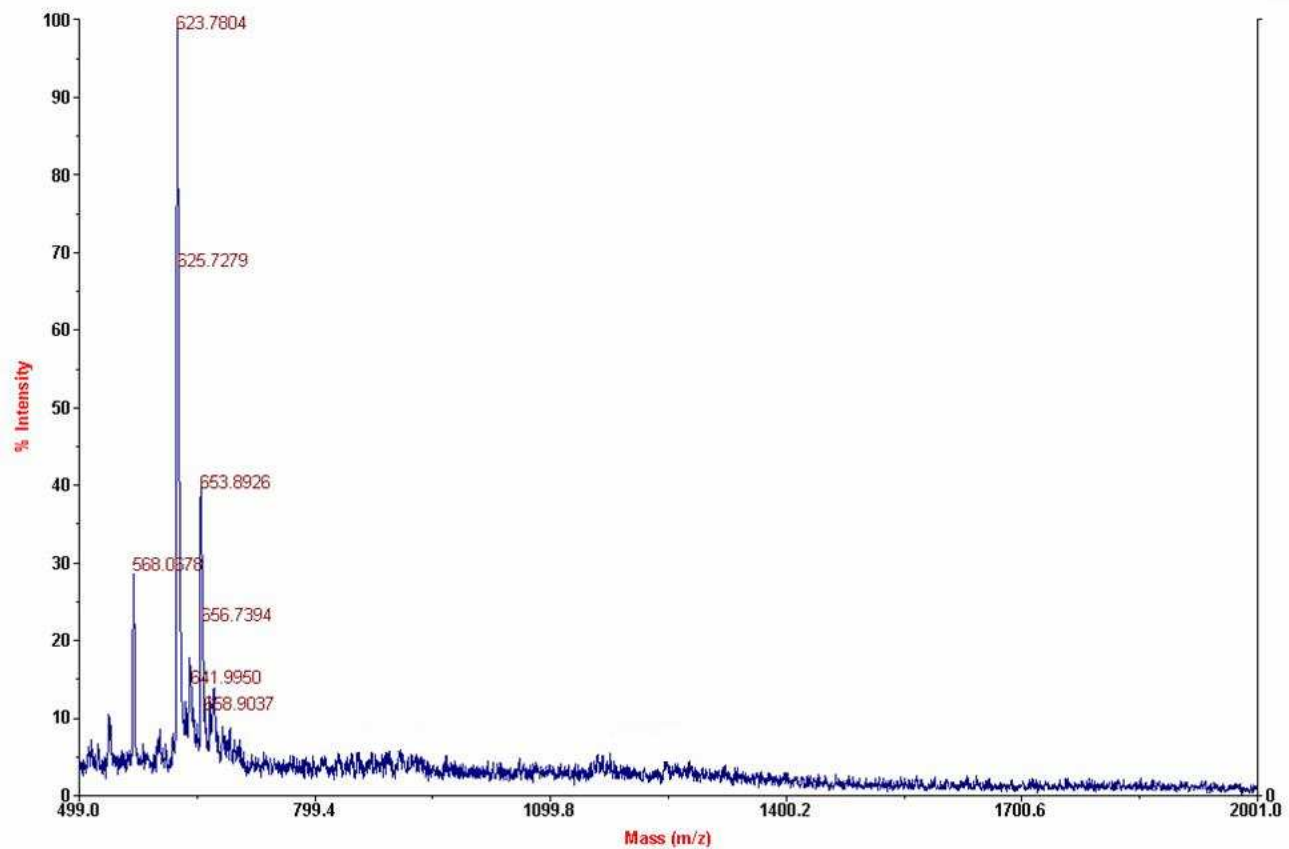

**Figure S4.** Mass spectrum of (TT-5-isoCor)Ni

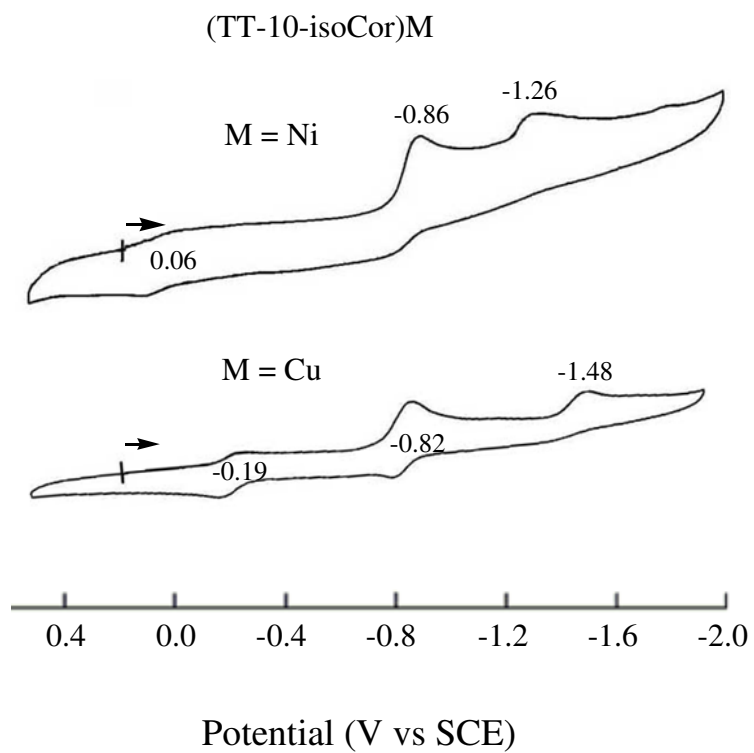

**Figure S5.** Cyclic voltammograms of (TT-10-isoCor)M, (a) M = Ni<sup>II</sup> and (b) M = Cu<sup>II</sup> in CH<sub>2</sub>Cl<sub>2</sub> containing 0.1M TBAP at -70 °C. Scan rate = 0.10 V/s.

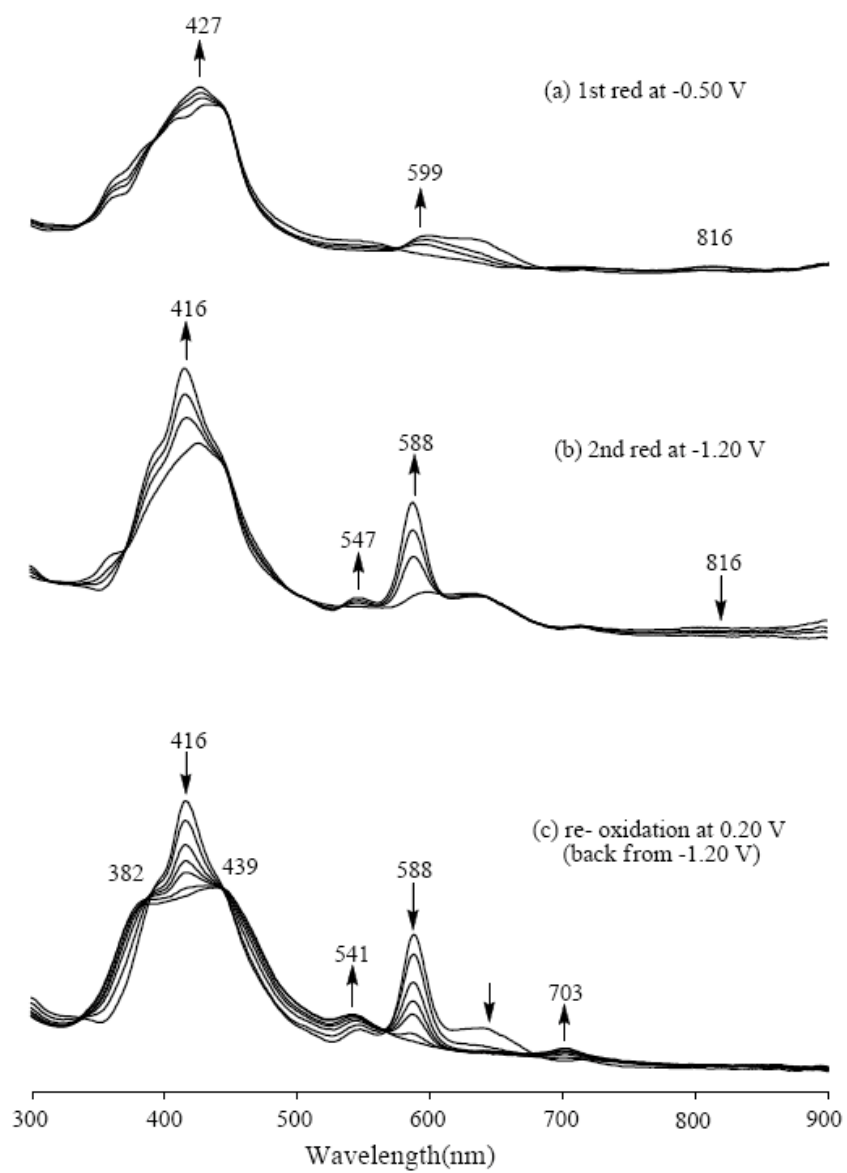

**Figure S6.** UV-vis spectral changes obtained during the reductions of (TT-10-isoCor)Ni in  $\text{CH}_2\text{Cl}_2$ , 0.1 M TBAP.

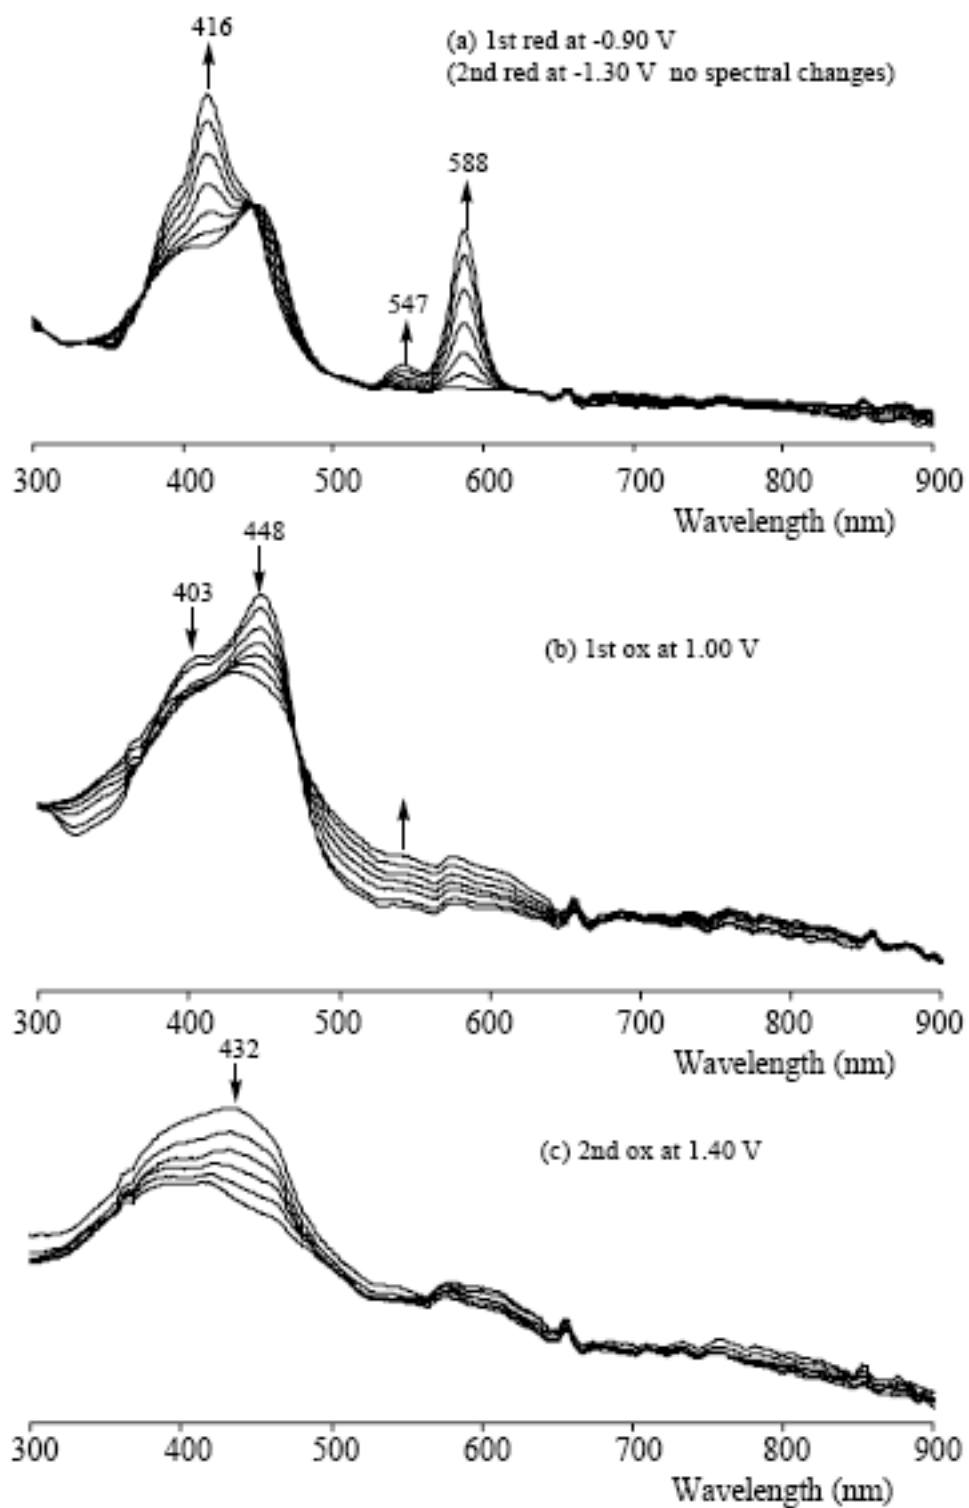

**Figure S7.** UV-vis spectral changes obtained during the oxidations of (TT-5-isoCor)Ni in  $\text{CH}_2\text{Cl}_2$ , 0.1 M TBAP.



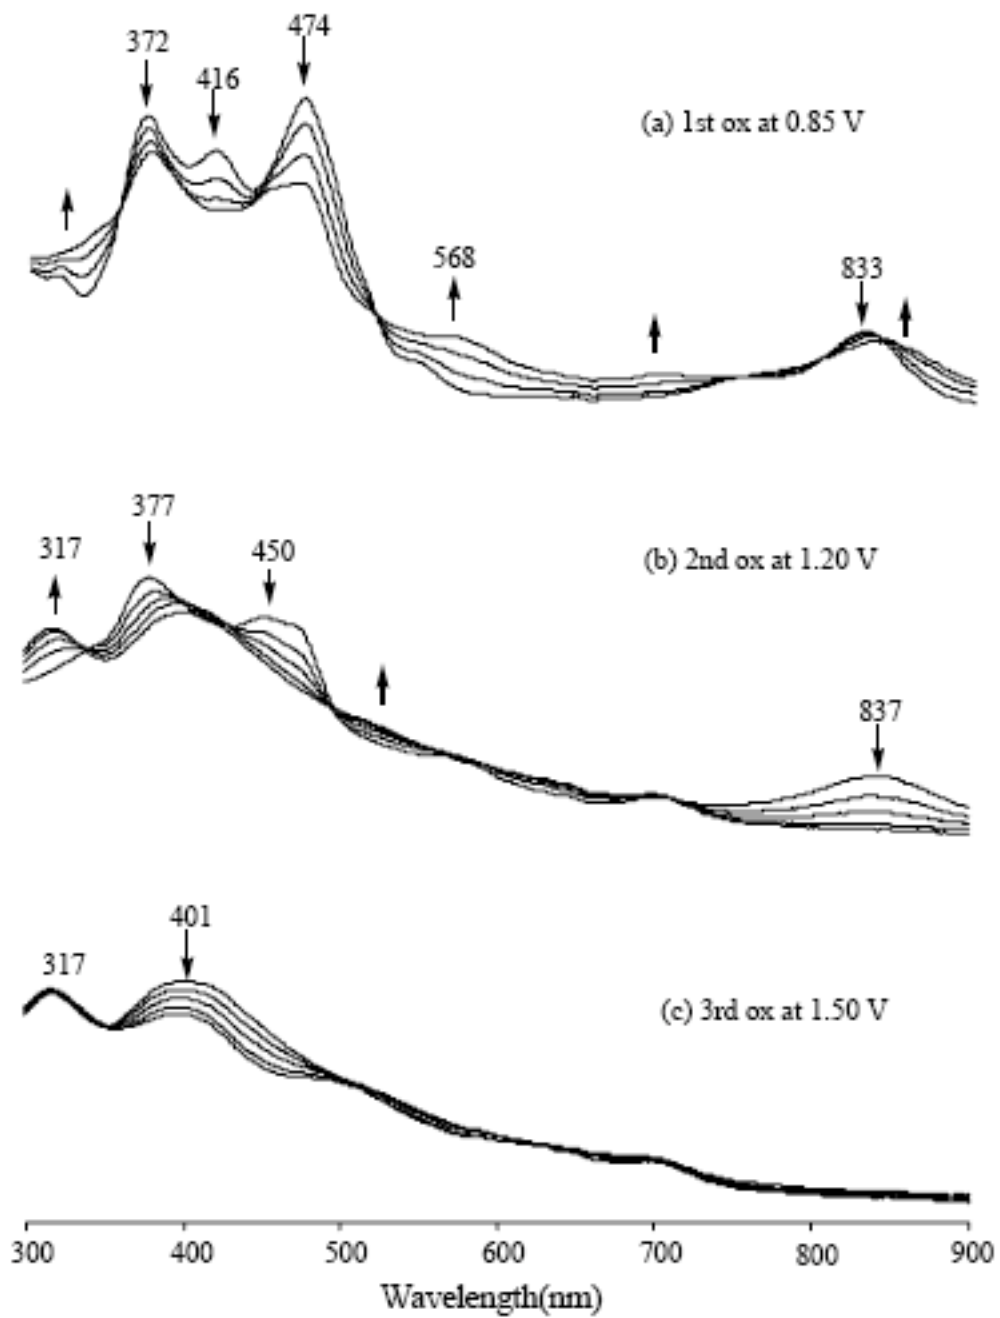

**Figure S8.** UV-vis spectral changes obtained during the oxidations of (TT-10-isoCor)Cu in  $\text{CH}_2\text{Cl}_2$ , 0.1 M TBAP.

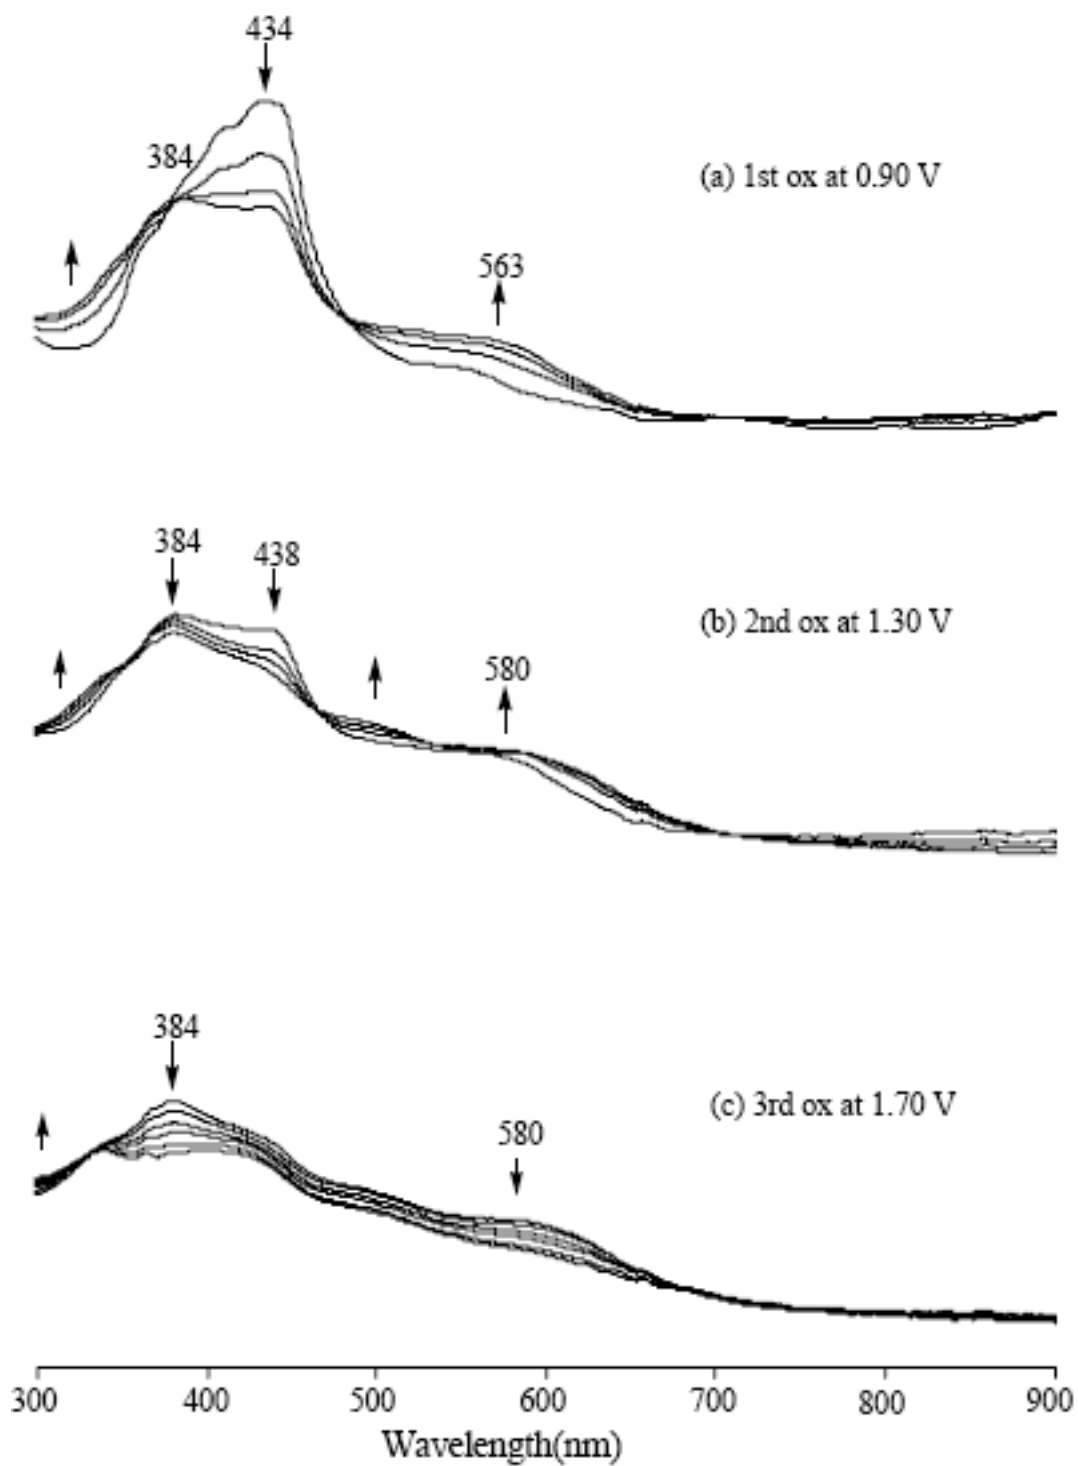

**Figure S9.** UV-vis spectral changes obtained during the oxidations of (TT-10-isoCor)Ni in  $\text{CH}_2\text{Cl}_2$ , 0.1 M TBAP

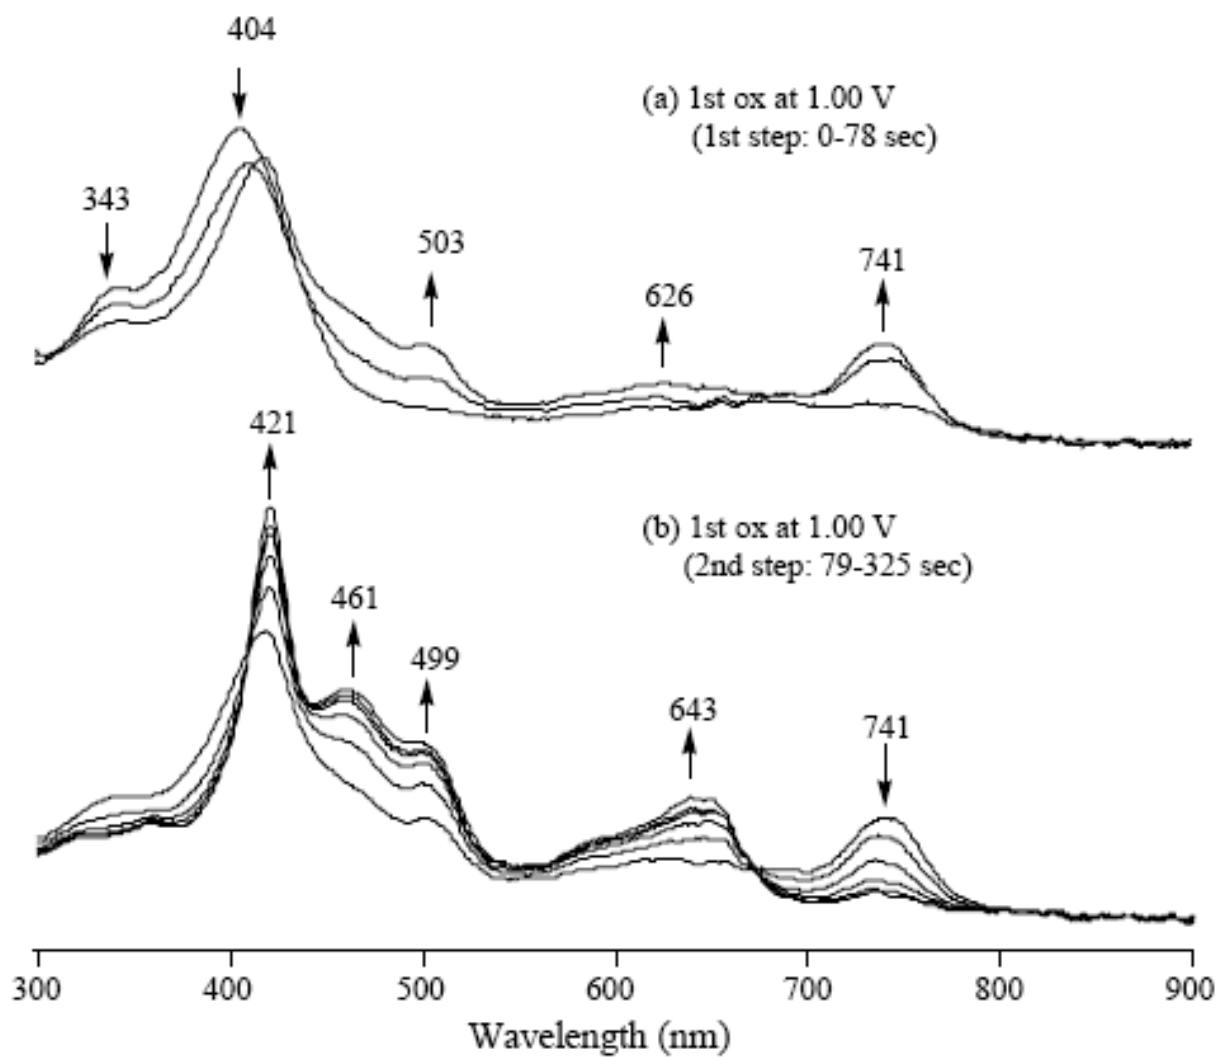

**Figure S10.** UV-vis spectral changes obtained during the oxidations of (TT-5-isoCor)H<sub>2</sub> in CH<sub>2</sub>Cl<sub>2</sub>, 0.1 M TBAP.

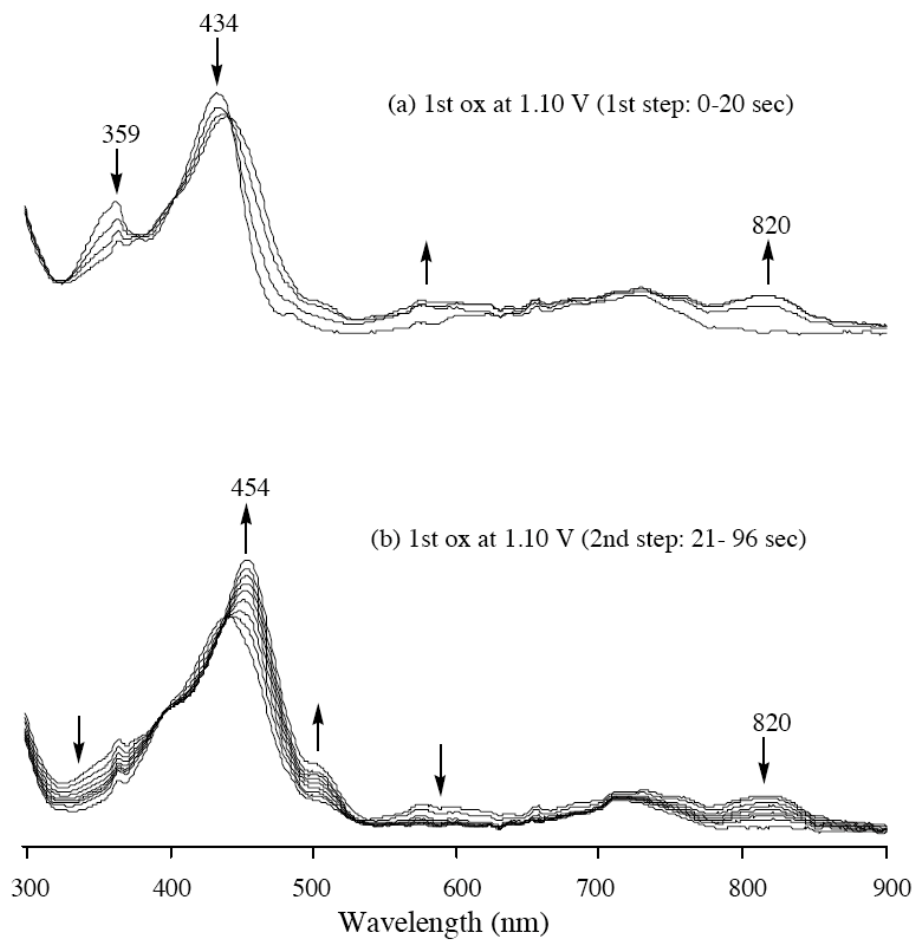

**Figure S11.** UV-vis spectral changes obtained during the oxidations of (TT-10-isoCor)Ni in CH<sub>2</sub>Cl<sub>2</sub>, 0.1 M TBAP.

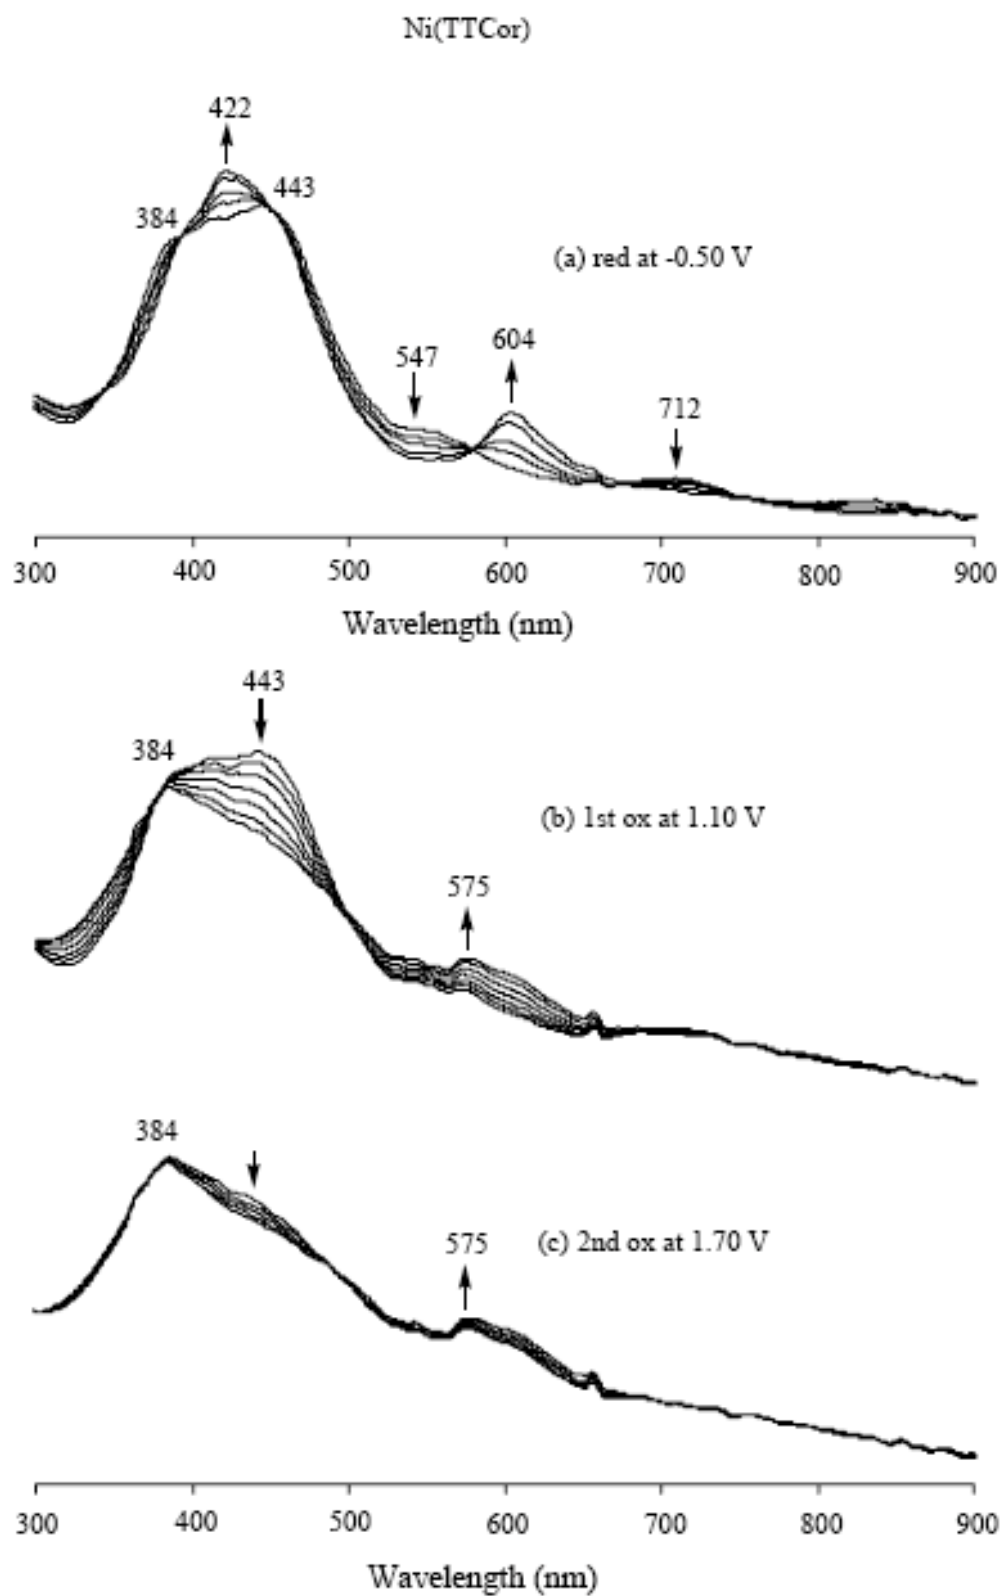

**Figure S12.** UV-vis spectral changes obtained during the reductions of (TTCor)Ni in CH<sub>2</sub>Cl<sub>2</sub>, 0.1 M TBAP.
